# Supplementary material
Source: PubMed Central journal article supplement (PMC3811830)
Supplement: IAI.00477-13_zii999090391so1.pdf [file IAI.00477-13_zii999090391so1.pdf]

Deciphering the contribution of human meningeothelial cells to the inflammatory /  
antimicrobial response at the meninges

Pierre-Joseph Royer, Andrew J. Rogers, Karl G. Wooldridge, Patrick Tighe, Jafar Mahdavi,  
Michael G. Rittig, Dlawer Ala'Aldeen.

School of Molecular Medical Sciences and School of Biomedical Sciences, University of  
Nottingham, UK

Supplemental Material

**Table S1.** Primers used for QPCR experiments

| <b>Primer</b> | <b>Sequence</b>      | <b>Product size</b> |
|---------------|----------------------|---------------------|
| GAPDH F       | GGGAAACTGTGGCGTGAT   | 98                  |
| GAPDH R       | TTCAGCTCAGGGATGACCTT |                     |
| Myd88 F       | TGAGGGAGCCTAACCATGTC | 100                 |
| Myd88 R       | TGGGTCCTTTCCAGAGTTTG |                     |
| TRIF F        | CCCTGTGGACAGTGGAAGAT | 80                  |
| TRIF R        | GCCCGTTTTGTCTAAATGA  |                     |
| IRAK-4 F      | CCACCCTCCAGACTTGAGAA | 81                  |
| IRAK-4 R      | TTGAAGTTGAGTGCCTGTGG |                     |
| TLR1 F        | GGGTCAGCTGGACTTCAGAG | 86                  |
| TLR1 R        | CGAACACATCGCTGACAACT |                     |
| TLR2 F        | GATGCCTACTGGGTGGAGAA | 94                  |
| TLR2 R        | CAGGAATGAAGTCCCCTTA  |                     |
| TLR3 F        | CTTTGCAACACTCCACCTCA | 89                  |
| TLR3 R        | AAGAGTTCAAAGGGGGCACT |                     |
| TLR4 F        | AGTCCATCGTTTGGTTCTGG | 95                  |
| TLR4 R        | CAATGGTCAAATTGCACAGG |                     |
| TLR5 F        | TACCGTTCGTCTGCTGTG   | 92                  |
| TLR5 R        | AGAAAGCACGTCAGCCATCT |                     |
| TLR6 F        | GGAGTGATGATGGGAGGAGA | 110                 |
| TLR6 R        | GGCCGAAACTGGTTTATTGA |                     |
| TLR7 F        | GGAAATTGCCCTCGTTGTTA | 102                 |
| TLR7 R        | TTCTGTCAGCGCATCAAAG  |                     |
| TLR8 F        | CCTGGCTCACCATTGTTTT  | 94                  |
| TLR8 R        | TTGGGATGTGAAAAGAGACC |                     |
| TLR9 F        | CCTATTCATGGACGGCAACT | 106                 |
| TLR9 R        | GAGTGACAGGTGGGTGAGGT |                     |

**Table S2.** Annotated gene transcripts differentially expressed by meningotheial cells after treatment with MC58.

|    | ID        | Symbol   | Log2 Fold change<br>(mean) | Description                                                                           |
|----|-----------|----------|----------------------------|---------------------------------------------------------------------------------------|
| 1  | M13509    | MMP1     | 3.80                       | matrix metalloproteinase 1 (interstitial collagenase)                                 |
| 2  | NM_000584 | IL8      | 3.38                       | interleukin 8                                                                         |
| 3  | NM_004591 | CCL20    | 3.06                       | chemokine (C-C motif) ligand 20                                                       |
| 4  | NM_005409 | CXCL11   | 2.92                       | chemokine (C-X-C motif) ligand 11                                                     |
| 5  | NM_000963 | PTGS2    | 2.90                       | prostaglandin-endoperoxide synthase 2 (prostaglandin G/H synthase and cyclooxygenase) |
| 6  | NM_001165 | BIRC3    | 2.84                       | baculoviral IAP repeat-containing 3                                                   |
| 7  | NM_080657 | RSAD2    | 2.83                       | radical S-adenosyl methionine domain containing 2                                     |
| 8  | NM_001547 | IFIT2    | 2.65                       | interferon-induced protein with tetratricopeptide repeats 2                           |
| 9  | NM_001565 | CXCL10   | 2.63                       | chemokine (C-X-C motif) ligand 10                                                     |
| 10 | NM_000758 | CSF2     | 2.63                       | colony stimulating factor 2 (granulocyte-macrophage)                                  |
| 11 | NM_002575 | SERPINF2 | 2.60                       | serpin peptidase inhibitor, clade B (ovalbumin), member 2                             |
| 12 | NM_000600 | IL6      | 2.53                       | interleukin 6 (interferon, beta 2)                                                    |
| 13 | NM_002176 | IFNB1    | 2.50                       | interferon, beta 1, fibroblast                                                        |
| 14 | NM_000201 | ICAM1    | 2.48                       | intercellular adhesion molecule 1                                                     |
| 15 | NM_014314 | DDX58    | 2.47                       | DEAD (Asp-Glu-Ala-Asp) box polypeptide 58                                             |
| 16 | NM_001549 | IFIT3    | 2.46                       | interferon-induced protein with tetratricopeptide repeats 3                           |
| 17 | NM_001548 | IFIT1    | 2.44                       | interferon-induced protein with tetratricopeptide repeats 1                           |
| 18 | NM_006290 | TNFAIP3  | 2.43                       | tumor necrosis factor, alpha-induced protein 3                                        |
| 19 | NM_003733 | OASL     | 2.21                       | 2'-5'-oligoadenylate synthetase-like                                                  |
| 20 | NM_002852 | PTX3     | 2.15                       | pentraxin 3, long                                                                     |
| 21 | NM_022168 | IFIH1    | 2.12                       | interferon induced with helicase C domain 1                                           |
| 22 | NM_001775 | CD38     | 2.07                       | CD38 molecule                                                                         |
| 23 | NM_021127 | PMAIP1   | 2.05                       | phorbol-12-myristate-13-acetate-induced protein 1                                     |
| 24 | NM_017414 | USP18    | 2.04                       | ubiquitin specific peptidase 18                                                       |
| 25 | NM_001511 | CXCL1    | 2.01                       | chemokine (C-X-C motif) ligand 1 (melanoma growth stimulating activity, alpha)        |
| 26 | AK001823  | GBP3     | 1.95                       | guanylate binding protein 3                                                           |
| 27 | NM_002198 | IRF1     | 1.93                       | interferon regulatory factor 1                                                        |
| 28 | AK022542  | PARP14   | 1.92                       | poly (ADP-ribose) polymerase family, member 14                                        |
| 29 | NM_000576 | IL1B     | 1.88                       | interleukin 1, beta                                                                   |
| 30 | NM_002985 | CCL5     | 1.88                       | chemokine (C-C motif) ligand 5                                                        |
| 31 | NM_002982 | CCL2     | 1.82                       | chemokine (C-C motif) ligand 2                                                        |
| 32 | NM_006417 | IFI44    | 1.82                       | interferon-induced protein 44                                                         |
| 33 | NM_007036 | ESM1     | 1.79                       | endothelial cell-specific molecule 1                                                  |
| 34 | NM_004165 | RRAD     | 1.78                       | Ras-related associated with diabetes                                                  |
| 35 | NM_020529 | NFKBIA   | 1.76                       | nuclear factor of kappa light polypeptide gene enhancer in B-cells inhibitor, alpha   |
| 36 | NM_003821 | RIPK2    | 1.67                       | receptor-interacting serine-threonine kinase 2                                        |
| 37 | NM_022147 | RTP4     | 1.66                       | receptor (chemosensory) transporter protein 4                                         |
| 38 | NM_017654 | SAMD9    | 1.65                       | sterile alpha motif domain containing 9                                               |
| 39 | NM_006734 | HIVEP2   | 1.61                       | human immunodeficiency virus type I enhancer binding protein 2                        |
| 40 | NM_012320 | PLA2G15  | 1.57                       | phospholipase A2, group XV                                                            |
| 41 | NM_001561 | TNFRSF9  | 1.55                       | tumor necrosis factor receptor superfamily, member 9                                  |
| 42 | NM_002462 | MX1      | 1.51                       | myxovirus (influenza virus) resistance 1, interferon-inducible protein p78 (mouse)    |
| 43 | NM_002053 | GBP1     | 1.38                       | guanylate binding protein 1, interferon-inducible, 67kDa                              |
| 44 | NM_000283 | PDE6B    | -1.30                      | phosphodiesterase 6B, cGMP-specific, rod, beta                                        |
| 45 | NM_005486 | TOM1L1   | -1.31                      | target of myb1 (chicken)-like 1                                                       |
| 46 | NM_003149 | STAC     | -1.32                      | SH3 and cysteine rich domain                                                          |
| 47 | NM_004746 | DLGAP1   | -1.32                      | discs, large (Drosophila) homolog-associated protein 1                                |
| 48 | NM_002275 | KRT15    | -1.32                      | keratin 15                                                                            |
| 49 | NM_016162 | ING4     | -1.33                      | inhibitor of growth family, member 4                                                  |
| 50 | NM_001149 | ANK3     | -1.34                      | ankyrin 3, node of Ranvier (ankyrin G)                                                |
| 51 | NM_014960 | ARSG     | -1.36                      | arylsulfatase G                                                                       |
| 52 | NM_025198 | MTERFD3  | -1.37                      | MTERF domain containing 3                                                             |
| 53 | NM_001733 | C1R      | -1.37                      | complement component 1, r subcomponent                                                |
| 54 | NM_006305 | ANP32A   | -1.38                      | acidic (leucine-rich) nuclear phosphoprotein 32 family, member A                      |
| 55 | NM_007098 | CLTCL1   | -1.39                      | clathrin, heavy chain-like 1                                                          |
| 56 | NM_000213 | ITGB4    | -1.40                      | integrin, beta 4                                                                      |
| 57 | NM_014936 | ENPP4    | -1.40                      | ectonucleotide pyrophosphatase/phosphodiesterase 4 (putative)                         |
| 58 | NM_001741 | CALCA    | -1.41                      | calcitonin-related polypeptide alpha                                                  |
| 59 | NM_002015 | FOXO1    | -1.41                      | forkhead box O1                                                                       |
| 60 | NM_005374 | MPP2     | -1.42                      | membrane protein, palmitoylated 2 (MAGUK p55 subfamily member 2)                      |
| 61 | NM_014585 | SLC40A1  | -1.43                      | solute carrier family 40 (iron-regulated transporter), member 1                       |
| 62 | NM_018093 | WDR74    | -1.43                      | WD repeat domain 74                                                                   |
| 63 | NM_020323 | ABCD4    | -1.44                      | ATP-binding cassette, sub-family D (ALD), member 4                                    |
| 64 | NM_020039 | ACCN2    | -1.45                      | amiloride-sensitive cation channel 2, neuronal                                        |
| 65 | NM_002297 | LCN1     | -1.45                      | lipocalin 1 (tear prealbumin)                                                         |
| 66 | NM_002153 | HSD17B2  | -1.45                      | hydroxysteroid (17-beta) dehydrogenase 2                                              |
| 67 | NM_000956 | PTGER2   | -1.46                      | prostaglandin E receptor 2 (subtype EP2), 53kDa                                       |
| 68 | NM_017832 | C9ORF6   | -1.46                      | chromosome 9 open reading frame 6                                                     |
| 69 | NM_023009 | MARCKSL1 | -1.46                      | MARCKS-like 1                                                                         |
| 70 | NM_018418 | SPATA7   | -1.48                      | spermatogenesis associated 7                                                          |
| 71 | NM_004684 | SPARCL1  | -1.48                      | SPARC-like 1 (hevin)                                                                  |
| 72 | NM_003551 | NME5     | -1.48                      | non-metastatic cells 5, protein expressed in (nucleoside-diphosphate kinase)          |
| 73 | NM_013436 | NCKAP1   | -1.50                      | NCK-associated protein 1                                                              |
| 74 | NM_014946 | SPAST    | -1.52                      | spastin                                                                               |
| 75 | NM_022169 | ABCG4    | -1.52                      | ATP-binding cassette, sub-family G (WHITE), member 4                                  |
| 76 | NM_001322 | CST2     | -1.54                      | cystatin SA                                                                           |
| 77 | NM_019848 | SLC10A3  | -1.54                      | solute carrier family 10 (sodium/bile acid cotransporter family), member 3            |
| 78 | NM_019899 | ABCC1    | -1.55                      | ATP-binding cassette, sub-family C (CFTR/MRP), member 1                               |
| 79 | NM_012266 | DNAJB5   | -1.55                      | DnaJ (Hsp40) homolog, subfamily B, member 5                                           |
| 80 | NM_025125 | C10ORF57 | -1.55                      | chromosome 10 open reading frame 57                                                   |
| 81 | NM_021154 | PSAT1    | -1.55                      | phosphoserine aminotransferase 1                                                      |
| 82 | NM_017677 | MTMR8    | -1.55                      | myotubularin related protein 8                                                        |
| 83 | NM_001854 | COL11A1  | -1.56                      | collagen, type XI, alpha 1                                                            |
| 84 | NM_006646 | WASF3    | -1.56                      | WAS protein family, member 3                                                          |
| 85 | NM_017987 | RUFY2    | -1.56                      | RUN and FYVE domain containing 2                                                      |
| 86 | NM_003505 | FZD1     | -1.56                      | frizzled homolog 1 (Drosophila)                                                       |
| 87 | NM_030881 | DDX17    | -1.56                      | DEAD (Asp-Glu-Ala-Asp) box polypeptide 17                                             |
| 88 | NM_022369 | STRA6    | -1.56                      | stimulated by retinoic acid gene 6 homolog (mouse)                                    |
| 89 | NM_024010 | MTRR     | -1.57                      | 5-methyltetrahydrofolate-homocysteine methyltransferase reductase                     |
| 90 | NM_014012 | REM1     | -1.57                      | RAS (RAD and GEM)-like GTP-binding 1                                                  |

|     |           |          |       |                                                                                   |
|-----|-----------|----------|-------|-----------------------------------------------------------------------------------|
| 91  | NM_000383 | AIRE     | -1.58 | autoimmune regulator                                                              |
| 92  | NM_007011 | ABHD2    | -1.58 | abhydrolase domain containing 2                                                   |
| 93  | NM_022353 | OSGEPL1  | -1.58 | O-sialoglycoprotein endopeptidase-like 1                                          |
| 94  | NM_012368 | OR2C1    | -1.58 | olfactory receptor, family 2, subfamily C, member 1                               |
| 95  | NM_000894 | LHB      | -1.59 | luteinizing hormone beta polypeptide                                              |
| 96  | NM_003385 | VSNL1    | -1.59 | visinin-like 1                                                                    |
| 97  | NM_006475 | POSTN    | -1.59 | periostin, osteoblast specific factor                                             |
| 98  | NM_001933 | DLST     | -1.60 | dihydroliipoamide S-succinyltransferase (E2 component of 2-oxo-glutarate complex) |
| 99  | NM_002003 | FCN1     | -1.60 | ficolin (collagen/fibrinogen domain containing) 1                                 |
| 100 | NM_018365 | MNS1     | -1.60 | meiosis-specific nuclear structural 1                                             |
| 101 | NM_020208 | SLC6A20  | -1.62 | solute carrier family 6 (proline IMINO transporter), member 20                    |
| 102 | NM_000133 | F9       | -1.63 | coagulation factor IX                                                             |
| 103 | NM_030901 | OR7A17   | -1.63 | olfactory receptor, family 7, subfamily A, member 17                              |
| 104 | NM_014554 | SENP1    | -1.63 | SUMO1/sentrin specific peptidase 1                                                |
| 105 | NM_018538 | ERMAP    | -1.64 | erythroblast membrane-associated protein (Scianna blood group)                    |
| 106 | NM_016544 | DNAJC27  | -1.64 | DnaJ (Hsp40) homolog, subfamily C, member 27                                      |
| 107 | NM_024997 | ATF7IP2  | -1.64 | activating transcription factor 7 interacting protein 2                           |
| 108 | NM_004081 | DAZ1     | -1.64 | deleted in azoospermia 1                                                          |
| 109 | NM_018849 | ABCB4    | -1.64 | ATP-binding cassette, sub-family B (MDR/TAP), member 4                            |
| 110 | NM_024639 | ZNF322A  | -1.65 | zinc finger protein 322A                                                          |
| 111 | NM_170753 | PGBD3    | -1.65 | piggyBac transposable element derived 3                                           |
| 112 | NM_001943 | DSG2     | -1.65 | desmoglein 2                                                                      |
| 113 | NM_021048 | MAGEA10  | -1.66 | melanoma antigen family A, 10                                                     |
| 114 | NM_022480 | KLHL25   | -1.66 | kelch-like 25 (Drosophila)                                                        |
| 115 | NM_002034 | FUT5     | -1.67 | fucosyltransferase 5 (alpha (1,3) fucosyltransferase)                             |
| 116 | NM_025259 | MSH5     | -1.67 | mutS homolog 5 (E. coli)                                                          |
| 117 | NM_000668 | ADH1B    | -1.67 | alcohol dehydrogenase 1B (class I), beta polypeptide                              |
| 118 | NM_007180 | TREH     | -1.67 | trehalase (brush-border membrane glycoprotein)                                    |
| 119 | NM_012230 | POMZP3   | -1.68 | POM121 and ZP3 fusion                                                             |
| 120 | NM_002009 | FGF7     | -1.69 | fibroblast growth factor 7                                                        |
| 121 | NM_002729 | HHEX     | -1.69 | hematopoietically expressed homeobox                                              |
| 122 | NM_021033 | RAP2A    | -1.69 | RAP2A, member of RAS oncogene family                                              |
| 123 | NM_004473 | FOXE1    | -1.71 | forkhead box E1 (thyroid transcription factor 2)                                  |
| 124 | NM_019888 | MC3R     | -1.71 | melanocortin 3 receptor                                                           |
| 125 | NM_001648 | KLK3     | -1.72 | kallikrein-related peptidase 3                                                    |
| 126 | NM_004110 | FDXR     | -1.73 | ferredoxin reductase                                                              |
| 127 | NM_000639 | FASLG    | -1.74 | Fas ligand (TNF superfamily, member 6)                                            |
| 128 | NM_019863 | F8       | -1.74 | coagulation factor VIII, procoagulant component                                   |
| 129 | NM_016827 | OGG1     | -1.76 | 8-oxoguanine DNA glycosylase                                                      |
| 130 | NM_019119 | PCDHB9   | -1.76 | protocadherin beta 9                                                              |
| 131 | NM_018355 | ZNF415   | -1.77 | zinc finger protein 415                                                           |
| 132 | NM_023013 | PRAMEF1  | -1.78 | PRAME family member 1                                                             |
| 133 | NM_016263 | FZR1     | -1.78 | fizzy/cell division cycle 20 related 1 (Drosophila)                               |
| 134 | NM_014009 | FOXP3    | -1.79 | forkhead box P3                                                                   |
| 135 | NM_052997 | ANKRD30A | -1.80 | ankyrin repeat domain 30A                                                         |
| 136 | NM_032638 | GATA2    | -1.81 | GATA binding protein 2                                                            |
| 137 | NM_032638 | GATA2    | -1.81 | GATA binding protein 2                                                            |
| 138 | AC009180  | EXOC4    | -1.81 | exocyst complex component 4                                                       |
| 139 | NM_003247 | THBS2    | -1.81 | thrombospondin 2                                                                  |
| 140 | NM_016123 | IRAK4    | -1.81 | interleukin-1 receptor-associated kinase 4                                        |
| 141 | NM_004732 | KCNAB3   | -1.83 | potassium voltage-gated channel, shaker-related subfamily, beta member 3          |
| 142 | NM_004628 | XPC      | -1.84 | xeroderma pigmentosum, complementation group C                                    |
| 143 | NM_001160 | APAF1    | -1.84 | apoptotic peptidase activating factor 1                                           |
| 144 | NM_053039 | UGT2B28  | -1.84 | UDP glucuronosyltransferase 2 family, polypeptide B28                             |
| 145 | NM_007281 | SCRG1    | -1.85 | stimulator of chondrogenesis 1                                                    |
| 146 | NM_001179 | ART3     | -1.85 | ADP-ribosyltransferase 3                                                          |
| 147 | NM_003301 | TRHR     | -1.86 | thyrotropin-releasing hormone receptor                                            |
| 148 | NM_013989 | DIO2     | -1.87 | deiodinase, iodothyronine, type II                                                |
| 149 | NM_080792 | SIRPA    | -1.87 | signal-regulatory protein alpha                                                   |
| 150 | NM_020652 | ZNF286A  | -1.90 | zinc finger protein 286A                                                          |
| 151 | NM_020394 | ZNF695   | -1.91 | zinc finger protein 695                                                           |
| 152 | NM_001340 | CYLC2    | -1.92 | cyclicin, basic protein of sperm head cytoskeleton 2                              |
| 153 | NM_022785 | EFCAB6   | -1.92 | EF-hand calcium binding domain 6                                                  |
| 154 | NM_005173 | ATP2A3   | -1.93 | ATPase, Ca++ transporting, ubiquitous                                             |
| 155 | NM_014393 | STAU2    | -1.93 | staufen, RNA binding protein, homolog 2 (Drosophila)                              |
| 156 | NM_022493 | NARFL    | -1.93 | nuclear prelamin A recognition factor-like                                        |
| 157 | NM_000557 | GDF5     | -1.94 | growth differentiation factor 5                                                   |
| 158 | NM_014626 | TAAR2    | -1.95 | trace amine associated receptor 2                                                 |
| 159 | NM_016820 | OGG1     | -1.95 | 8-oxoguanine DNA glycosylase                                                      |
| 160 | AF313485  | VCP      | -1.95 | valosin-containing protein                                                        |
| 161 | NM_012222 | MUTYH    | -1.97 | mutY homolog (E. coli)                                                            |
| 162 | NM_016651 | DACT1    | -1.98 | dapper, antagonist of beta-catenin, homolog 1 (Xenopus laevis)                    |
| 163 | NM_022576 | PDC      | -1.99 | phosducin                                                                         |
| 164 | NM_018951 | HOXA10   | -2.00 | homeobox A10                                                                      |
| 165 | NM_004039 | ANXA2    | -2.01 | annexin A2                                                                        |
| 166 | NM_024578 | OCEL1    | -2.01 | occludin/ELL domain containing 1                                                  |
| 167 | NM_014686 | KIAA0355 | -2.01 | KIAA0355                                                                          |
| 168 | NM_016144 | COMMD10  | -2.01 | COMM domain containing 10                                                         |
| 169 | NM_024612 | DHX40    | -2.04 | DEAH (Asp-Glu-Ala-His) box polypeptide 40                                         |
| 170 | NM_022083 | FAM129A  | -2.04 | family with sequence similarity 129, member A                                     |
| 171 | NM_024345 | DCAF10   | -2.05 | DDB1 and CUL4 associated factor 10                                                |
| 172 | NM_013987 | PARK2    | -2.05 | Parkinson disease (autosomal recessive, juvenile) 2, parkin                       |
| 173 | NM_001840 | CNR1     | -2.06 | cannabinoid receptor 1 (brain)                                                    |
| 174 | NM_000511 | FUT2     | -2.07 | fucosyltransferase 2 (secretor status included)                                   |
| 175 | NM_000180 | GUCY2D   | -2.08 | guanylate cyclase 2D, membrane (retina-specific)                                  |
| 176 | U71278    | F12      | -2.11 | coagulation factor XII (Hageman factor)                                           |
| 177 | NM_005212 | CSN3     | -2.11 | casein kappa                                                                      |
| 178 | NM_022777 | RABL5    | -2.12 | RAB, member RAS oncogene family-like 5                                            |
| 179 | NM_025061 | LRRRC8E  | -2.12 | leucine rich repeat containing 8 family, member E                                 |
| 180 | NM_023948 | MOSPD3   | -2.12 | motile sperm domain containing 3                                                  |
| 181 | NM_004436 | ENSA     | -2.12 | endosulfine alpha                                                                 |
| 182 | NM_025080 | ASRGL1   | -2.13 | asparaginase like 1                                                               |

|     |           |           |       |                                                                                                                  |
|-----|-----------|-----------|-------|------------------------------------------------------------------------------------------------------------------|
| 183 | NM_015043 | TBC1D9B   | -2.14 | TBC1 domain family, member 9B (with GRAM domain)                                                                 |
| 184 | NM_000182 | HADHA     | -2.14 | hydroxyacyl-CoA dehydrogenase/3-ketoacyl-CoA thiolase/enoyl-CoA hydratase (trifunctional protein), alpha subunit |
| 185 | NM_018338 | WDR52     | -2.15 | WD repeat domain 52                                                                                              |
| 186 | NM_024834 | C10ORF119 | -2.15 | chromosome 10 open reading frame 119                                                                             |
| 187 | NM_024665 | TBL1XR1   | -2.16 | transducin (beta)-like 1 X-linked receptor 1                                                                     |
| 188 | NM_000575 | IL1A      | -2.16 | interleukin 1, alpha                                                                                             |
| 189 | NM_015286 | SYNM      | -2.17 | synemin, intermediate filament protein                                                                           |
| 190 | NM_003469 | SCG2      | -2.17 | secretogranin II                                                                                                 |
| 191 | NM_022829 | SLC13A3   | -2.18 | solute carrier family 13 (sodium-dependent dicarboxylate transporter), member 3                                  |
| 192 | NM_004078 | CSRP1     | -2.19 | cysteine and glycine-rich protein 1                                                                              |
| 193 | NM_001965 | EGR4      | -2.21 | early growth response 4                                                                                          |
| 194 | NM_002377 | MAS1      | -2.21 | MAS1 oncogene                                                                                                    |
| 195 | NM_003340 | UBE2D3    | -2.21 | ubiquitin-conjugating enzyme E2D 3 (UBC4/5 homolog, yeast)                                                       |
| 196 | NM_000911 | OPRD1     | -2.22 | opioid receptor, delta 1                                                                                         |
| 197 | NM_003994 | KITLG     | -2.22 | KIT ligand                                                                                                       |
| 198 | NM_024837 | ATP8B4    | -2.23 | ATPase, class I, type 8B, member 4                                                                               |
| 199 | NM_004116 | FKBP1B    | -2.23 | FK506 binding protein 1B, 12.6 kDa                                                                               |
| 200 | NM_000655 | SELL      | -2.24 | selectin L                                                                                                       |
| 201 | NM_014413 | EIF2AK1   | -2.25 | eukaryotic translation initiation factor 2-alpha kinase 1                                                        |
| 202 | NM_020351 | COL8A1    | -2.25 | collagen, type VIII, alpha 1                                                                                     |
| 203 | NM_024835 | GGNBP2    | -2.28 | gametogenetin binding protein 2                                                                                  |
| 204 | NM_024531 | GPR172A   | -2.29 | G protein-coupled receptor 172A                                                                                  |
| 205 | NM_003596 | TPST1     | -2.29 | tyrosylprotein sulfotransferase 1                                                                                |
| 206 | NM_022061 | MRPL17    | -2.30 | mitochondrial ribosomal protein L17                                                                              |
| 207 | NM_025115 | C8ORF41   | -2.30 | chromosome 8 open reading frame 41                                                                               |
| 208 | NM_003737 | DCHS1     | -2.32 | dachsous 1 (Drosophila)                                                                                          |
| 209 | NM_024295 | DERL1     | -2.32 | Der1-like domain family, member 1                                                                                |
| 210 | NM_000864 | HTR1D     | -2.33 | 5-hydroxytryptamine (serotonin) receptor 1D                                                                      |
| 211 | NM_002318 | LOXL2     | -2.33 | lysyl oxidase-like 2                                                                                             |
| 212 | NM_002221 | ITPKB     | -2.34 | inositol 1,4,5-trisphosphate 3-kinase B                                                                          |
| 213 | NM_020127 | TUFT1     | -2.34 | tuftelin 1                                                                                                       |
| 214 | NM_004768 | SRSF11    | -2.35 | serine/arginine-rich splicing factor 11                                                                          |
| 215 | NM_017790 | RGS3      | -2.36 | regulator of G-protein signaling 3                                                                               |
| 216 | NM_002082 | GRK6      | -2.37 | G protein-coupled receptor kinase 6                                                                              |
| 217 | NM_020323 | ABCD5     | -2.37 | ATP-binding cassette, sub-family D (ALD), member 5                                                               |
| 218 | NM_002631 | PGD       | -2.37 | phosphogluconate dehydrogenase                                                                                   |
| 219 | NM_024871 | MAP6D1    | -2.37 | MAP6 domain containing 1                                                                                         |
| 220 | NM_022453 | RNF25     | -2.39 | ring finger protein 25                                                                                           |
| 221 | NM_003023 | SH3BP2    | -2.39 | SH3-domain binding protein 2                                                                                     |
| 222 | NM_022169 | ABCG5     | -2.40 | ATP-binding cassette, sub-family G (WHITE), member 5                                                             |
| 223 | NM_000615 | NCAM1     | -2.40 | neural cell adhesion molecule 1                                                                                  |
| 224 | NM_024330 | SLC27A3   | -2.40 | solute carrier family 27 (fatty acid transporter), member 3                                                      |
| 225 | NM_002035 | KDSR      | -2.40 | 3-ketodihydrospingosine reductase                                                                                |
| 226 | NM_005074 | SLC17A1   | -2.41 | solute carrier family 17 (sodium phosphate), member 1                                                            |
| 227 | NM_000916 | OXTR      | -2.41 | oxytocin receptor                                                                                                |
| 228 | NM_024325 | ZNF343    | -2.41 | zinc finger protein 343                                                                                          |
| 229 | NM_000994 | RPL32     | -2.42 | ribosomal protein L32                                                                                            |
| 230 | NM_022304 | HRH2      | -2.42 | histamine receptor H2                                                                                            |
| 231 | NM_024868 | OBSCN     | -2.42 | obscurin, cytoskeletal calmodulin and titin-interacting RhoGEF                                                   |
| 232 | NM_024945 | RMI1      | -2.42 | RMI1, RecQ mediated genome instability 1, homolog (S. cerevisiae)                                                |
| 233 | NM_025212 | CXXC4     | -2.42 | CXXC finger 4                                                                                                    |
| 234 | NM_007011 | ABHD14    | -2.43 | abhydrolase domain containing 14                                                                                 |
| 235 | NM_020139 | BDH2      | -2.44 | 3-hydroxybutyrate dehydrogenase, type 2                                                                          |
| 236 | NM_021806 | FAM3A     | -2.44 | family with sequence similarity 3, member A                                                                      |
| 237 | NM_021806 | FAM3A     | -2.44 | family with sequence similarity 3, member A                                                                      |
| 238 | NM_006419 | CXCL13    | -2.45 | chemokine (C-X-C motif) ligand 13                                                                                |
| 239 | NM_024527 | ABHD20    | -2.45 | abhydrolase domain containing 20                                                                                 |
| 240 | NM_018401 | STK32B    | -2.46 | serine/threonine kinase 32B                                                                                      |
| 241 | NM_020998 | MST1      | -2.46 | macrophage stimulating 1 (hepatocyte growth factor-like)                                                         |
| 242 | NM_000521 | HEXB      | -2.46 | hexosaminidase B (beta polypeptide)                                                                              |
| 243 | NM_025181 | SLC35F5   | -2.48 | solute carrier family 35, member F5                                                                              |
| 244 | NM_019093 | UGT1A3    | -2.48 | UDP glucuronosyltransferase 1 family, polypeptide A3                                                             |
| 245 | NM_024037 | C10RF135  | -2.49 | chromosome 1 open reading frame 135                                                                              |
| 246 | NM_024860 | SETD6     | -2.50 | SET domain containing 6                                                                                          |
| 247 | NM_001379 | DNMT1     | -2.50 | DNA (cytosine-5-)-methyltransferase 1                                                                            |
| 248 | NM_024989 | PGAP1     | -2.52 | post-GPI attachment to proteins 1                                                                                |
| 249 | NM_024859 | MAGIX     | -2.53 | MAGI family member, X-linked                                                                                     |
| 250 | NM_003005 | SELP      | -2.53 | selectin P (granule membrane protein 140kDa, antigen CD62)                                                       |
| 251 | NM_002739 | PRKCG     | -2.53 | protein kinase C, gamma                                                                                          |
| 252 | NM_017952 | PTCD3     | -2.53 | Pentatricopeptide repeat domain 3                                                                                |
| 253 | NM_025003 | ADAMTS20  | -2.53 | ADAM metalloproteinase with thrombospondin type 1 motif, 20                                                      |
| 254 | NM_023931 | ZNF747    | -2.53 | zinc finger protein 747                                                                                          |
| 255 | NM_006414 | RPP38     | -2.54 | ribonuclease P/MRP 38kDa subunit                                                                                 |
| 256 | NM_021727 | FADS3     | -2.54 | fatty acid desaturase 3                                                                                          |
| 257 | NM_016185 | HN1       | -2.56 | hematological and neurological expressed 1                                                                       |
| 258 | NM_012390 | SMR3A     | -2.57 | submaxillary gland androgen regulated protein 3A                                                                 |
| 259 | NM_006275 | SRSF6     | -2.57 | serine/arginine-rich splicing factor 6                                                                           |
| 260 | NM_001980 | STX2      | -2.58 | syntaxin 2                                                                                                       |
| 261 | NM_005434 | MALL      | -2.58 | mal, T-cell differentiation protein-like                                                                         |
| 262 | NM_018644 | B3GAT1    | -2.59 | beta-1,3-glucuronosyltransferase 1 (glucuronosyltransferase P)                                                   |
| 263 | NM_024751 | GSTCD     | -2.59 | glutathione S-transferase, C-terminal domain containing                                                          |
| 264 | NM_006402 | HBXIP     | -2.60 | hepatitis B virus x interacting protein                                                                          |
| 265 | NM_005217 | DEFA3     | -2.63 | defensin, alpha 3, neutrophil-specific                                                                           |
| 266 | NM_022477 | NDRG3     | -2.64 | NDRG family member 3                                                                                             |
| 267 | NM_024619 | FN3KRP    | -2.65 | fructosamine 3 kinase related protein                                                                            |
| 268 | NM_024527 | ABHD8     | -2.65 | abhydrolase domain containing 8                                                                                  |
| 269 | NM_005998 | CCT3      | -2.66 | chaperonin containing TCP1, subunit 3 (gamma)                                                                    |
| 270 | NM_024327 | ZNF576    | -2.67 | zinc finger protein 576                                                                                          |
| 271 | NM_001066 | TNFRSF1B  | -2.67 | tumor necrosis factor receptor superfamily, member 1B                                                            |
| 272 | NM_006874 | ELF2      | -2.68 | E74-like factor 2 (ets domain transcription factor)                                                              |
| 273 | NM_022910 | NDRG4     | -2.68 | NDRG family member 4                                                                                             |
| 274 | NM_006305 | ANP32A    | -2.69 | acidic (leucine-rich) nuclear phosphoprotein 32 family, member A                                                 |

|     |           |         |       |                                                                                                                  |
|-----|-----------|---------|-------|------------------------------------------------------------------------------------------------------------------|
| 275 | NM_000860 | HPGD    | -2.70 | hydroxyprostaglandin dehydrogenase 15-(NAD)                                                                      |
| 276 | NM_025235 | TNKS2   | -2.70 | tankyrase, TRF1-interacting ankyrin-related ADP-ribose polymerase 2                                              |
| 277 | NM_018070 | SSBP3   | -2.70 | single stranded DNA binding protein 3                                                                            |
| 278 | NM_023940 | RASL11B | -2.70 | RAS-like, family 11, member B                                                                                    |
| 279 | NM_002347 | LY6H    | -2.71 | lymphocyte antigen 6 complex, locus H                                                                            |
| 280 | NM_005383 | NEU2    | -2.75 | sialidase 2 (cytosolic sialidase)                                                                                |
| 281 | NM_021133 | RNASEL  | -2.77 | ribonuclease L (2',5'-oligoadenylate synthetase-dependent)                                                       |
| 282 | NM_022367 | SEMA4A  | -2.78 | sema domain, immunoglobulin domain (Ig), transmembrane domain (TM) and short cytoplasmic domain, (semaphorin) 4A |
| 283 | NM_023007 | JMJD4   | -2.80 | jumonji domain containing 4                                                                                      |
| 284 | NM_025109 | MYO19   | -2.80 | myosin XIX                                                                                                       |
| 285 | NM_017614 | BHMT2   | -2.80 | betaine--homocysteine S-methyltransferase 2                                                                      |
| 286 | NM_015136 | STAB1   | -2.81 | stabilin 1                                                                                                       |
| 287 | NM_024642 | GALNT12 | -2.81 | UDP-N-acetyl-alpha-D-galactosamine:polypeptide N-acetylgalactosaminyltransferase 12 (GalNAc-T12)                 |
| 288 | NM_017442 | TLR9    | -2.83 | toll-like receptor 9                                                                                             |
| 289 | NM_022490 | POLR1E  | -2.85 | polymerase (RNA) I polypeptide E, 53kDa                                                                          |
| 290 | NM_024045 | DDX50   | -2.86 | DEAD (Asp-Glu-Ala-Asp) box polypeptide 50                                                                        |
| 291 | NM_002731 | PRKACB  | -2.86 | protein kinase, cAMP-dependent, catalytic, beta                                                                  |
| 292 | NM_000379 | XDH     | -2.88 | xanthine dehydrogenase                                                                                           |
| 293 | NM_025135 | FHOD3   | -2.88 | formin homology 2 domain containing 3                                                                            |
| 294 | NM_031313 | ALPPL2  | -2.90 | alkaline phosphatase, placental-like 2                                                                           |
| 295 | NM_022068 | FAM38B  | -2.91 | family with sequence similarity 38, member B                                                                     |
| 296 | NM_024301 | FKRP    | -2.91 | fukutin related protein                                                                                          |
| 297 | NM_003729 | RTCD1   | -2.92 | RNA terminal phosphate cyclase domain 1                                                                          |
| 298 | NM_002415 | MIF     | -2.97 | macrophage migration inhibitory factor (glycosylation-inhibiting factor)                                         |
| 299 | NM_025211 | GKAP1   | -2.98 | G kinase anchoring protein 1                                                                                     |
| 300 | NM_014753 | BMS1    | -3.00 | BMS1 homolog, ribosome assembly protein (yeast)                                                                  |
| 301 | NM_012113 | CA14    | -3.04 | carbonic anhydrase XIV                                                                                           |
| 302 | NM_025203 | C2ORF44 | -3.06 | chromosome 2 open reading frame 44                                                                               |
| 303 | NM_003704 | FAM193A | -3.06 | family with sequence similarity 193, member A                                                                    |
| 304 | NM_018930 | PCDHB10 | -3.08 | protocadherin beta 10                                                                                            |
| 305 | NM_001483 | GBAS    | -3.10 | glioblastoma amplified sequence                                                                                  |
| 306 | NM_014138 | FAM156A | -3.93 | family with sequence similarity 156, member A                                                                    |
